# Supplementary material for: The type‐I interferon response potentiates seeded tau aggregation and exacerbates tau pathology
Source: PubMed Central journal article supplement (PMC10916982; doi:10.1002/alz.13493), 2023-10-17
Supplement: ALZ-20-1013-s001.pdf [file ALZ-20-1013-s001.pdf]

**Supplementary Figure 1: Tau seeding assay in primary mixed neural cultures.** (A) IFN $\beta$  concentration in the supernatant of *Ifnar1*<sup>+/+</sup> P301S-tau and *Ifnar1*<sup>-/-</sup> P301S-tau cultures treated overnight with polyI:C, measured by ELISA; n = 3/genotype. (B) Western blot of *Ifnar1*<sup>+/+</sup> P301S-tau cultures treated overnight with polyI:C (2.5 mg/mL) and probed for ISG IFITM3. Western blot representative of N = 2 independent experiments. (C) Tau monomer and assemblies (50 nM) were added to cultures and levels of AT8 reactivity measured by immunofluorescence and quantified by image analysis; n = 4, N = 2 independent experiments. (D) Titration of recombinant tau assemblies on cultures from *Ifnar1*<sup>+/+</sup> P301S-tau and *Ifnar1*<sup>-/-</sup> P301S-tau mice. Tau assemblies were added at DIV7 and seeded tau aggregation (AT8 epitope) was quantified at DIV14 by image analysis; n = 5, N = 2 independent experiments. 'n' = wells/condition, each containing 30,000 plated cells. All error bars indicate mean  $\pm$  SD. Scale bar = 100  $\mu$ m. Significance calculated by Kruskal-Wallis test for C. \*\*\*\*P < 0.0001; \*\*P < 0.01; \*P < 0.05; ns, not significant.



**Supplementary Figure 2: Microglial phenotypes and inflammation in organotypic hippocampal slice cultures.** (A) Representative images of Iba1+ microglia staining in organotypic hippocampal slice cultures (OHSCs) from P301S-tau mice, from DIV1 to DIV21. (B) Microglial ramification was quantified manually by using a binary mask to calculate perimeter and area and expressed as area/perimeter (n = 15 microglia/timepoint, from N = 3 OHSCs). (C) Microglial nuclei number was quantified manually in a FOV of 100  $\mu$ m<sup>2</sup> (N = 3 OHSCs). (D) The concentration of Macrophage Inflammatory Protein 1 alpha (MIP-1 $\alpha$ ) secreted by OHSCs into the supernatant was determined by ELISA; N = 3 OHSCs/sample; N = 3 independent experiments. Significance calculated by one-way ANOVA for B, C. \*\*\*\*P < 0.0001; \*\*P < 0.01; \*P < 0.05; ns, not significant.

**a****b****Supplementary Figure 3: Responses to IFN-I in primary mixed neural cultures.**

(A) Representative immunofluorescence images in cultures from *Ifnar1*<sup>+/+</sup> P301S-tau mice following overnight incubation with IFN $\beta$  (50 U/mL). Staining for STAT1 and GFAP or (B) MAP2 and IFITM3 suggested that both STAT1 and IFITM3 are expressed in astrocytes. Images representative of n = 3 wells/condition, N = 2 independent experiments. Scale bars = 100  $\mu$ m.



### Supplementary Figure 4: Glial depletion in P301S-tau mixed neural cultures.

(A) Quantification of area covered by GFAP+ astrocytes following LME treatment, normalised to DAPI count for each image, and normalised to no-treatment condition (NTC);  $n = 5$ ,  $N = 3$  independent experiments. (B) LME treated cultures were stained for NeuN and the number of NeuN+ nuclei quantified by image analysis. Values are presented normalised to the no-treatment condition and/or the DAPI count;  $n = 5$ ,  $N = 2$  independent experiments. (C) The concentration of Macrophage Inflammatory Protein 1 alpha (MIP-1 $\alpha$ ) was measured in untreated and LME-treated cultures;  $n = 3$ ,  $N = 3$  independent experiments. (D) Representative image of AT8 staining for seeded aggregation induced by tau assemblies (50 nM) in untreated and LME-treated cultures (15 mM for 4h), in the presence and absence of IFN $\beta$  (50 U/mL). (E) Quantification of the area fraction covered by MAP2+ cells and MAP2 intensity/FOV in LME-treated cultures, normalised to the no-treatment condition;  $n = 5$ ,  $N = 3$  independent experiments. (F) Quantification of area covered by GFAP+ astrocytes following PLX3397 (PLX, 2 $\mu$ M) treatment, normalised to DAPI count for each image, and normalised to no-treatment condition;  $n = 5$ ,  $N = 3$  independent experiments. (G) The number of NeuN+ nuclei in PLX3397-treated cultures was quantified by image analysis. Values are presented normalised to the no-treatment condition and/or the

DAPI count; n = 5, N = 3 independent experiments. **(H)** The concentration of MIP-1 $\alpha$  was measured in untreated and PLX3397-treated cultures; n = 3, N = 3 independent experiments. **(I)** Quantification of the area fraction covered by MAP2+ cells and MAP2 intensity/FOV in PLX3397-treated cultures, normalised to the no-treatment condition; n = 5, N = 3 independent experiments. **(J)** Representative image of MAP2 and AT8 staining for seeded aggregation induced by tau assemblies (25 nM) in untreated and PLX3397-treated cultures, in the presence and absence of IFN $\beta$  (50 U/mL). **(K)** Iba1+ area fraction in PLX3397-treated cultures was quantified and normalised to DMSO treated cultures; n = 5, N = 3 independent experiments. **(L)** Quantification of NeuN+ nuclei normalised to the DAPI count and **(M)** area fraction covered by MAP2+ cells and MAP2 intensity/FOV in AraC-treated cultures from E15.5 *Ifnar1*<sup>+/+</sup> P301S-tau mice, treated with tau assemblies (20 nM) +/- IFN $\beta$  (25 U/mL) normalised to the no-treatment condition for M; n = 10 from N = 2 independent plates. 'n' = wells/condition, each containing 30,000 plated cells. All error bars indicate mean  $\pm$  SD. Scale bars = 100  $\mu$ m. Significance calculated by Welch's t-test for A, B, C, E, Kruskal-Wallis test for F-I, L, M and two-way ANOVA for K. \*\*\*\*P < 0.0001; \*\*P < 0.01; \*P < 0.05; ns, not significant.



**Supplementary Figure 5: Cytokine profile and tau pathology analysis of *Ifnar1*<sup>+/+</sup> P301S-tau and *Ifnar1*<sup>-/-</sup> P301S-tau mice. (A)** Replot of additional cytokines from 48-plex Luminex assay in Fig. 4 comparing cortical cytokine profile of wildtype (n = 6 M), *Ifnar1*<sup>+/+</sup> P301S-tau (n = 3 M, n = 4 F), *Ifnar1*<sup>-/-</sup> P301S-tau (n = 4 M, n = 3 F) mice at 22 weeks of age. **(B)** Representative immunofluorescence image from sagittal section of 22 week P301S-tau transgenic mice showing AT8 positive tau inclusions are found in the cell body and axons of NeuN<sup>+</sup> neurons in the cerebral cortex. **(C)** Capillary gel electrophoresis western blot of cortical homogenate from *Ifnar1*<sup>-/-</sup> P301S-tau, *Ifnar1*<sup>+/+</sup> P301S-tau and WT mice using Tau12 (anti-human tau) and GAPDH antibodies, and **(D)** quantification of human tau intensity relative to GAPDH. **(E)** Immunofluorescence images of fibrillar tau staining in sagittal section of 22 week P301S-tau transgenic mice, showing pentameric form of formyl thiophene acetic acid (pFTAA) colocalisation with

AT8 positive tau inclusions in the cerebral cortex. (F) Representative images of pFTAA staining in the cerebral cortex of 22 week *Ifnar1<sup>+/+</sup>* P301S-tau and *Ifnar1<sup>+/+</sup>* P301S-tau mice. (G) Representative image of NeuN staining in the cerebral cortex of 22 week *Ifnar1<sup>+/+</sup>* P301S-tau and *Ifnar1<sup>+/+</sup>* P301S-tau mice at 22 weeks. Scale bar = 100  $\mu\text{m}$  for B, C, 200  $\mu\text{m}$  for D and 1000  $\mu\text{m}$  for E. Significance calculated by one-way ANOVA for A. \*\*\*\*P < 0.0001; \*\*P < 0.01; \*P < 0.05; ns, not significant.
